# Supplementary material for: Viruses in Laboratory Drosophila and Their Impact on Host Gene Expression
Source: MDPI journal article supplement (doi:10.3390/v15091849), 2023-08-31
Supplement: s1 [file s1]

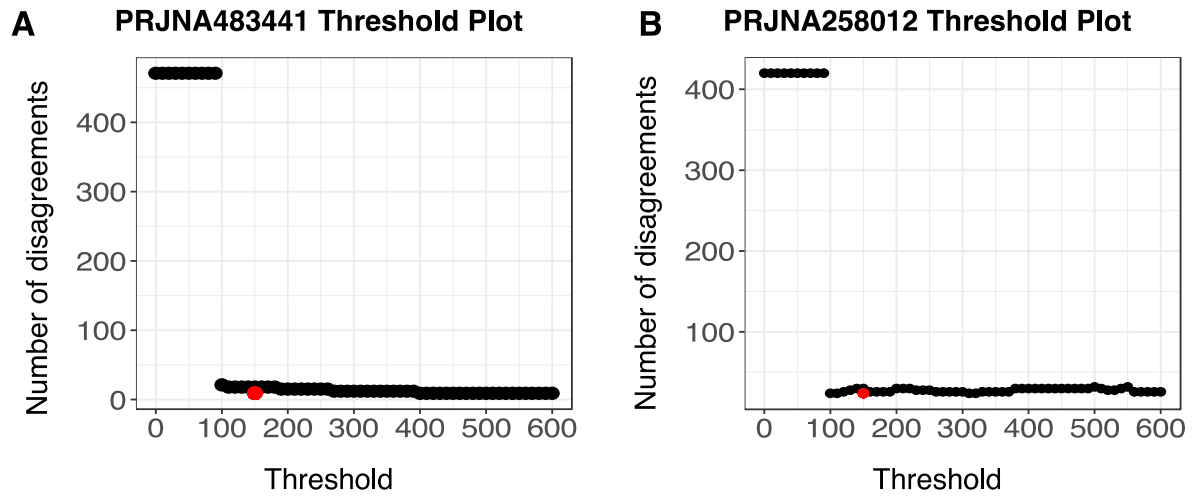

**Figure S1 Best threshold to estimate viral presence**

The datasets PRJNA483441 (A) and PRJNA258012 (B) have duplicate libraries. We compared the number of duplicates where there were disagreements in virus infection status when different threshold values from 0 to 600 were used i.e., the number of duplicates where one has present and the other has absent for a particular virus. The threshold at 150 is coloured red.
