# Supplementary material for: Viruses in Laboratory Drosophila and Their Impact on Host Gene Expression
Source: MDPI journal article supplement (doi:10.3390/v15091849), 2023-08-31
Supplement: s1 [file s1]

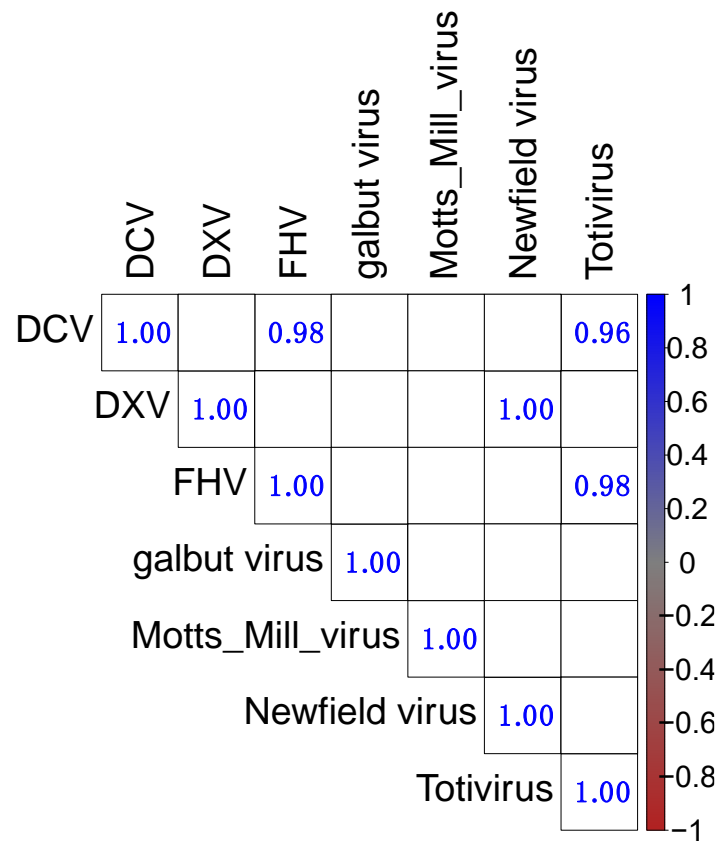

**Figure S2 Correlations between normalised reads in PRJNA258012**

The figure shows significant ( $p < 0.001$ )  $r$  values obtained via Spearman correlation between the normalised virus reads (RPKM) in samples in the dataset PRJNA258012. Blank squares have non-significant correlations.
