# Supplementary material for: Viruses in Laboratory Drosophila and Their Impact on Host Gene Expression
Source: MDPI journal article supplement (doi:10.3390/v15091849), 2023-08-31

## Nora virus

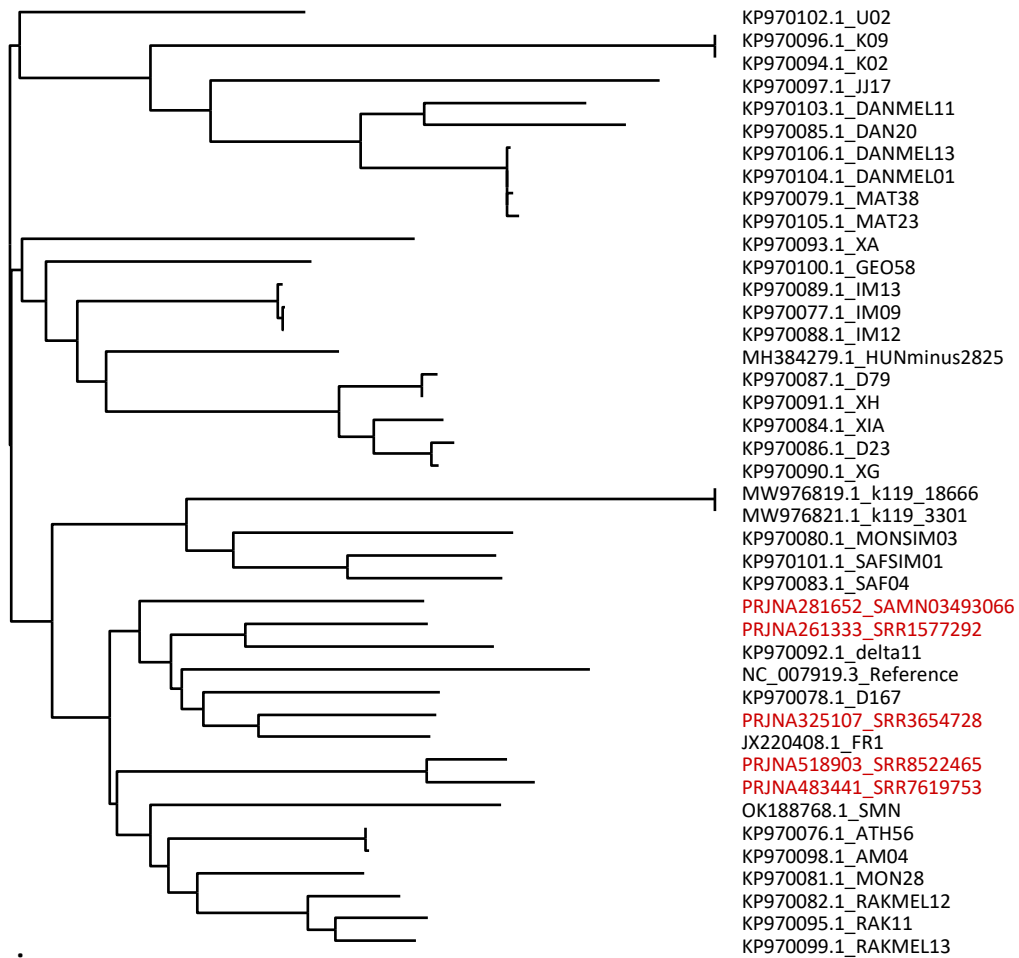

## Thika virus

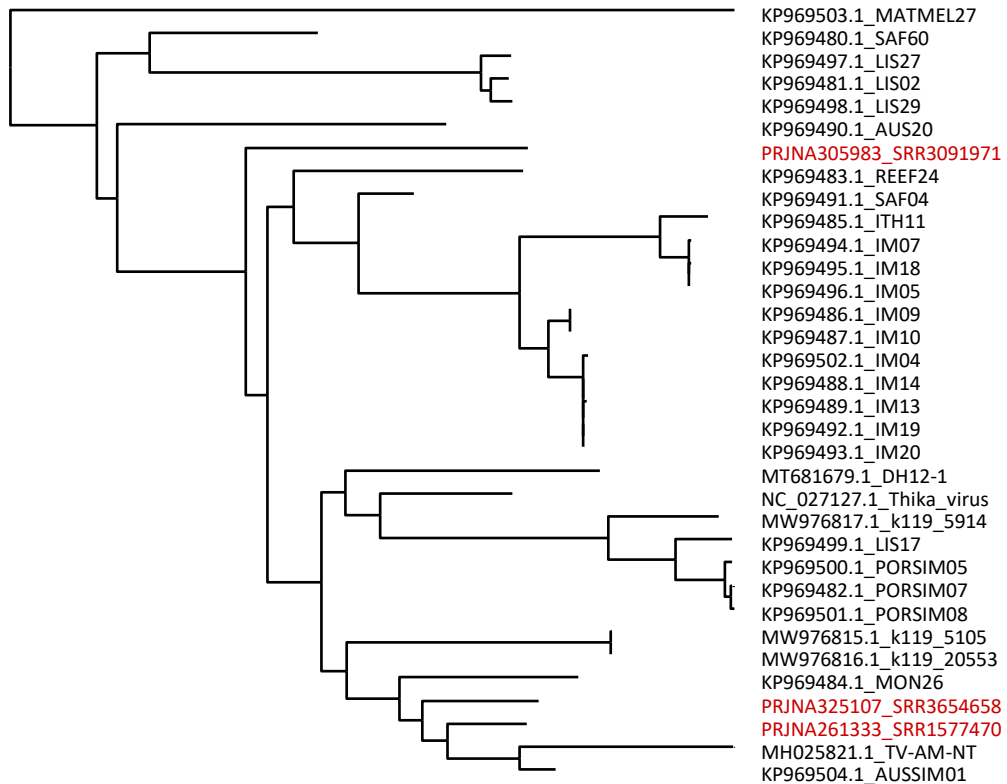

## Drosophila A virus

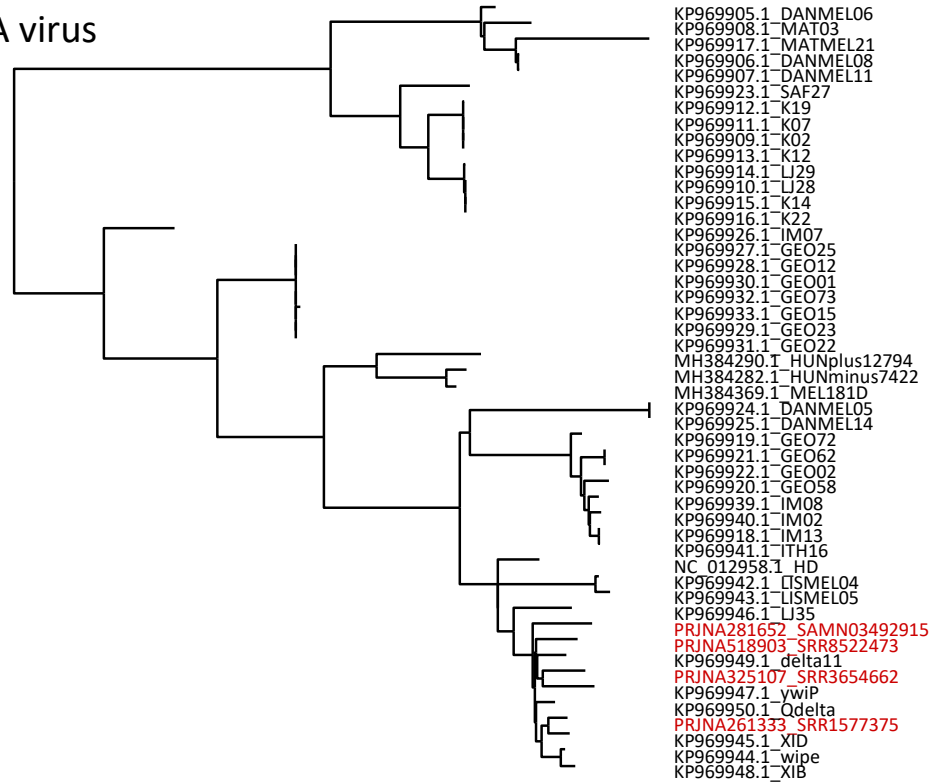

## Drosophila C virus

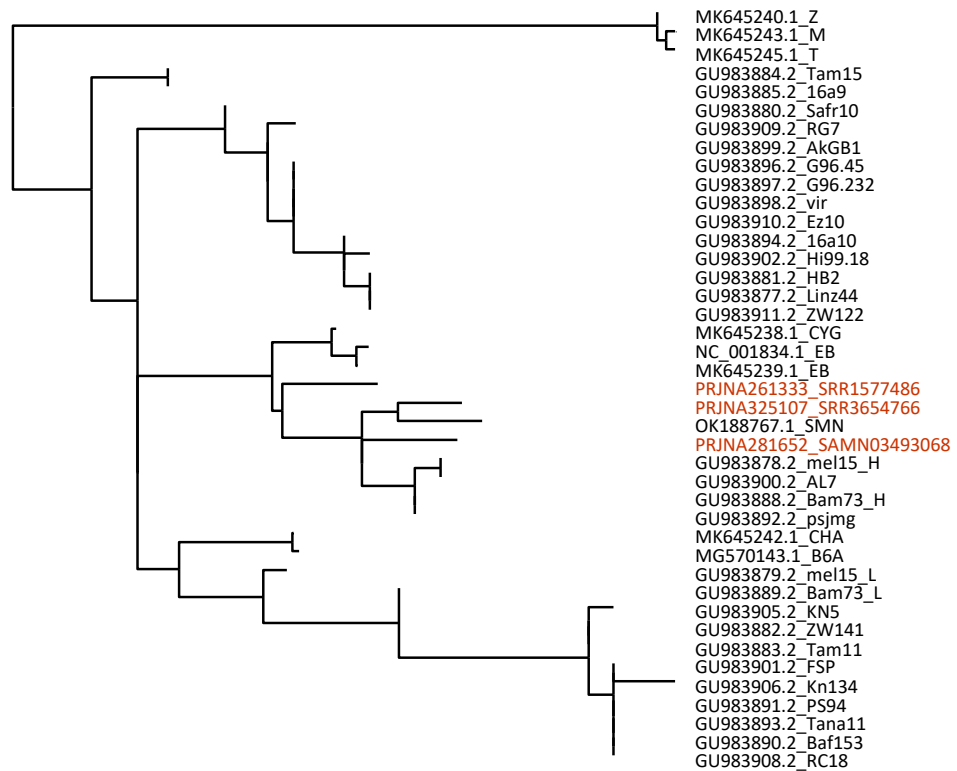

Craigies Hill virus (Segment 1)

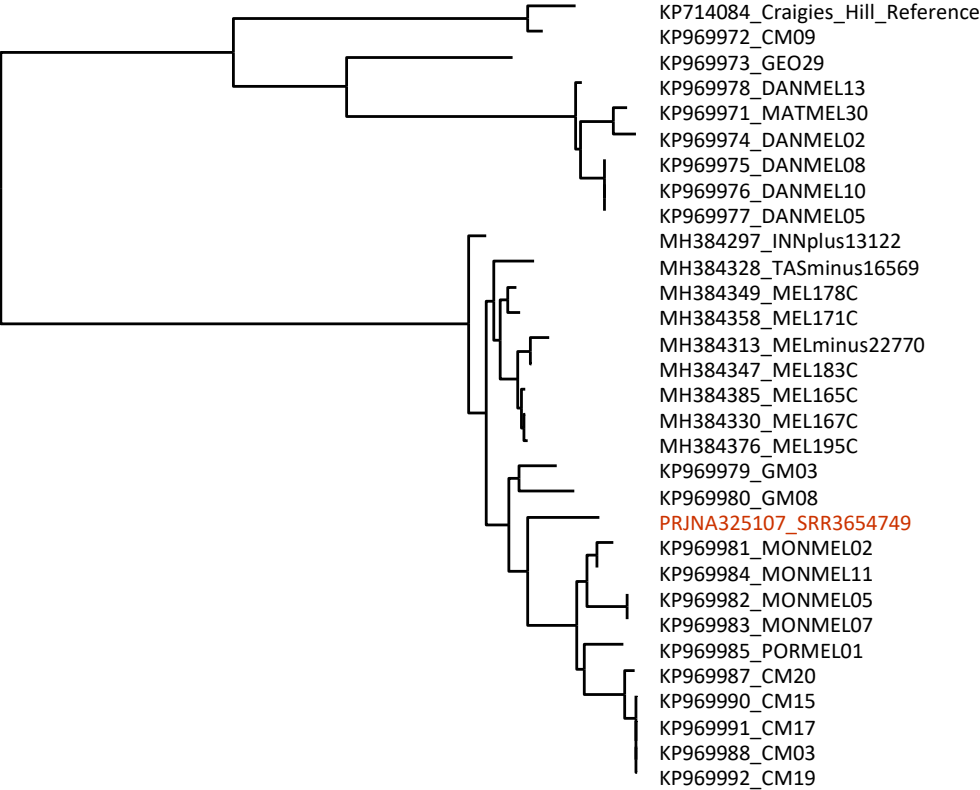

Bloomfield virus (Segment 1)

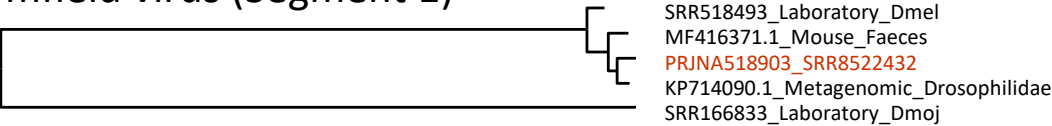

Brandeis virus

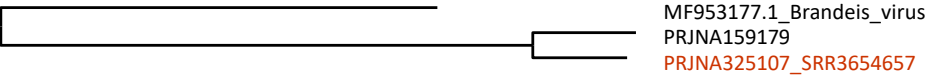

## Galbut virus (Segment 2)

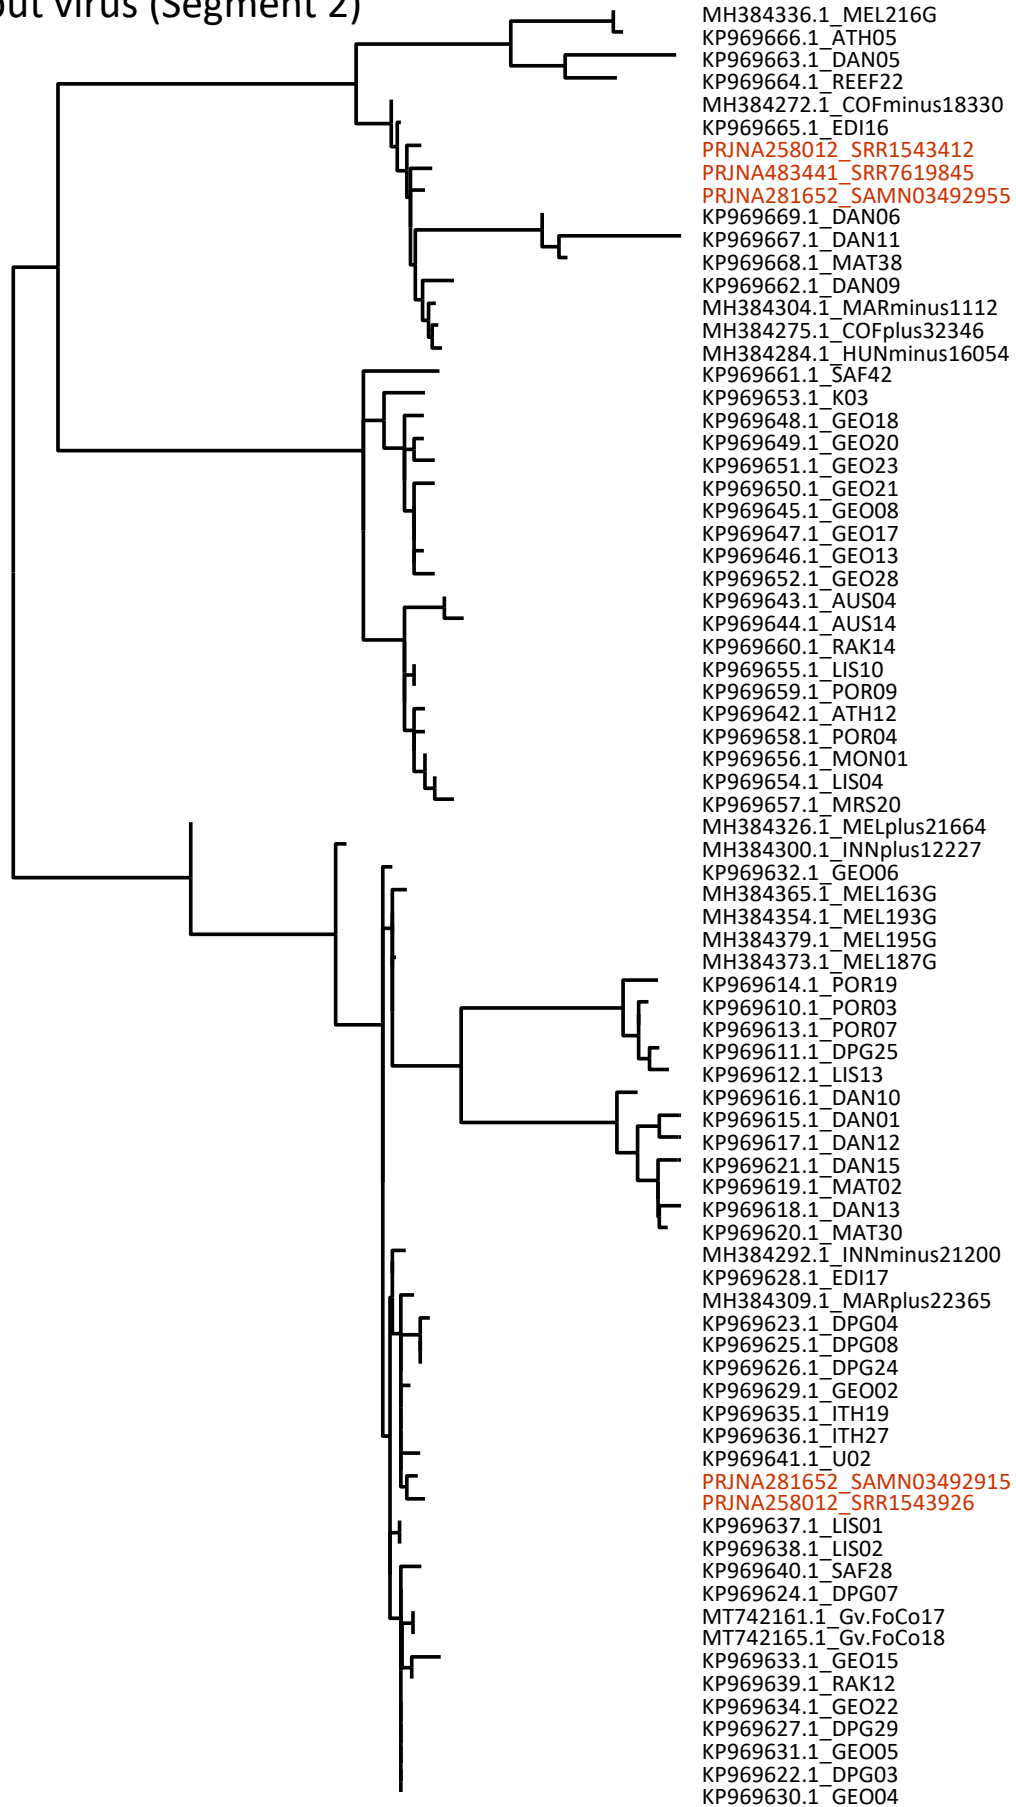

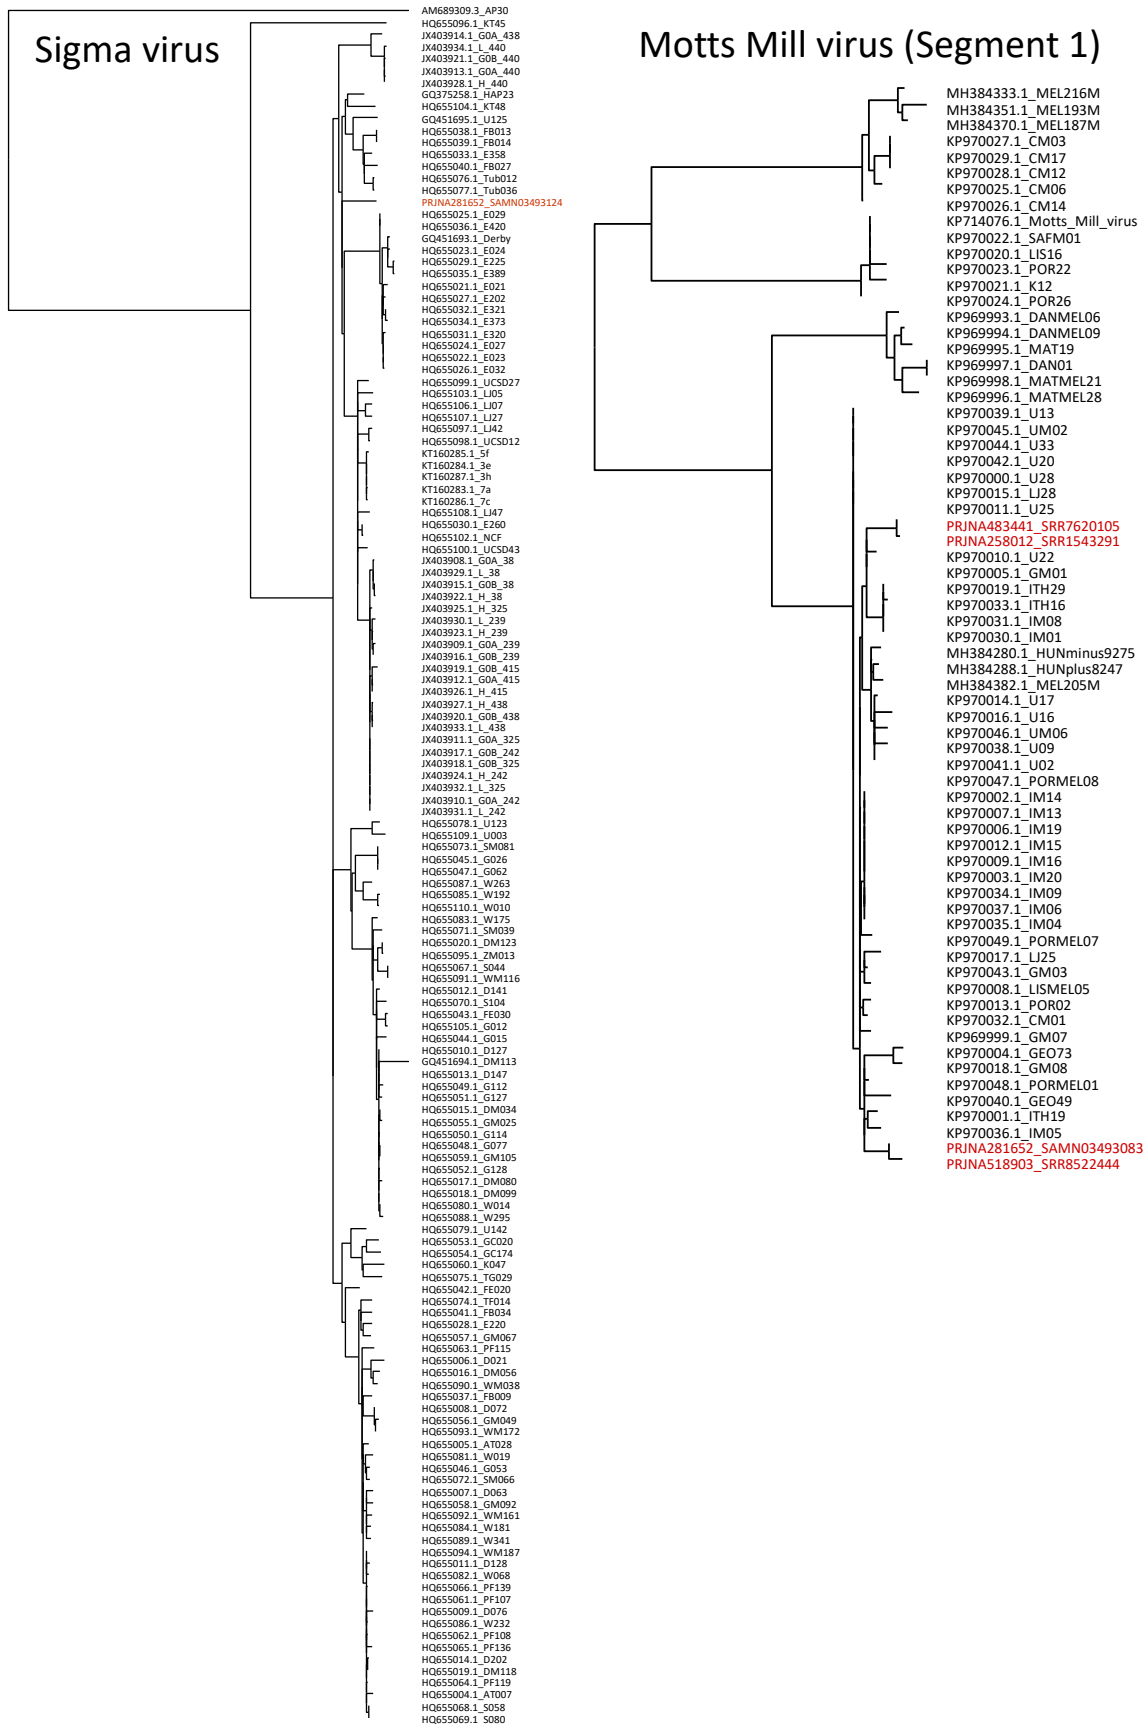

Supplement: s1 [file s1]
