# Supplementary figures and images for: Viruses in Laboratory Drosophila and Their Impact on Host Gene Expression
Source: MDPI journal article supplement (doi:10.3390/v15091849), 2023-08-31

**A) DAV**

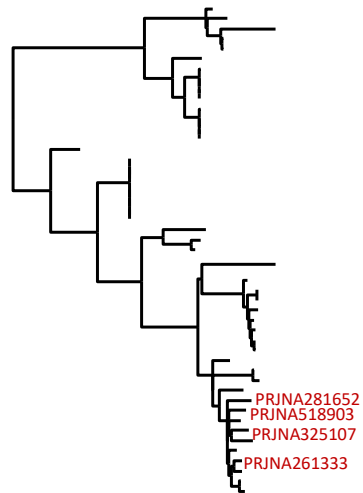

**B) Nora Virus**

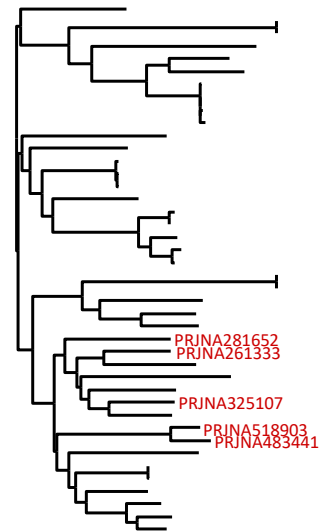

**C) DCV**

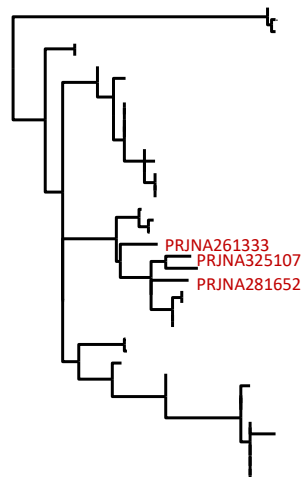

**D) Thika virus**

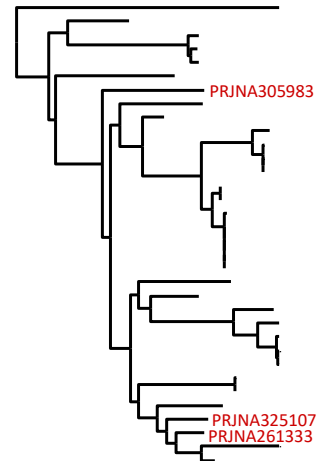

Supplement: s1 [file s1]
